# Supplementary material for: AMPK Phosphorylation Is Controlled by Glucose Transport Rate in a PKA-Independent Manner
Source: MDPI journal article supplement (doi:10.3390/ijms22179483), 2021-08-31
Supplement: s1 [file s1]

## Supplementary information

### AMPK phosphorylation is controlled by glucose transport rate in a PKA-independent manner

Riccardo Milanesi, Farida Tripodi, Jacopo Vertemara, Renata Tisi, Paola Coccetti

**Supplementary Table S1**

| Strain                      | Genotype                                                                                                                                                                                                                               | Source                    |
|-----------------------------|----------------------------------------------------------------------------------------------------------------------------------------------------------------------------------------------------------------------------------------|---------------------------|
| W303 1a                     |                                                                                                                                                                                                                                        | OpenBiosystem             |
| CDC25 <sup>T1490P</sup>     | W303-1a <i>cdc25::CDC25<sup>T1490P</sup></i>                                                                                                                                                                                           | Peeters et al., 2017      |
| <i>ras2Δ</i>                | BY472 <i>ras2::KanMX</i>                                                                                                                                                                                                               | This work                 |
| <i>tpk1Δtpk2Δtpk3Δyak1Δ</i> | W303-1a <i>tpk1::ADE8tpk2::HIS3tpk3::TRP1yak1::LEU2ura3-52leu2-3,112trp1ade8</i>                                                                                                                                                       | Van De Velde et al., 2008 |
| <i>pde1Δcyr1Δyak1Δ</i>      | W303-1a <i>pde2::TRP1cyr1::KanMXyak1::LEU2</i>                                                                                                                                                                                         | Van De Velde et al., 2008 |
| Hxt-Null                    | CENPK2C MATa <i>MAL2-8cSUC2hxt17ura3-52gal2::loxPstl1::loxPagt1::loxPydl247w::loxPyjr160c::loxPhxt13::loxPhxt15::loxPhxt16::loxPhxt14::loxPhxt12::loxPhxt9::loxPhxt11::loxPhxt10::loxPhxt8::loxPhxt514::loxPhxt2::loxPhxt367::loxP</i> | Elbing et al., 2004       |
| Hxt1 only                   | HXT7prom-HXT1-HXT7term <i>ura3-52::URA3</i>                                                                                                                                                                                            | Elbing et al., 2004       |
| Hxt7 only                   | HXT7prom-HXT7-HXT7term <i>ura3-52::URA3</i>                                                                                                                                                                                            | Elbing et al., 2004       |
| Tm6*                        | HXT7prom-TM6(HXT1 bp1-741, HXT7 bp742-1713)-HXT7term <i>ura3-52::URA3</i>                                                                                                                                                              | Elbing et al., 2004       |
| CENPK2C                     | <i>leu2-3ura3-52trp1-2898his3-1MAL2-8CSUC2HXT17</i>                                                                                                                                                                                    | Elbing et al., 2004       |
| <i>pfk1Δpfk2Δ</i>           | CENPK2C <i>pfk1::KanMXpfk2::HPH</i>                                                                                                                                                                                                    | This work                 |
| CENPK JT4                   | Mata <i>LCR1</i>                                                                                                                                                                                                                       | Kummel et al., 2010       |
| <i>pfk1Δpfk2Δ</i>           | CENPK JT4 <i>pfk1::KanMXpfk2::HPH</i>                                                                                                                                                                                                  | This work                 |
| <i>pfk1Δpfk2Δ</i>           | W303-1a <i>pfk1::KanMXpfk2::HPH</i>                                                                                                                                                                                                    | This work                 |
| Snf1-TAP                    | BY4741 <i>SNF1-TAPHIS3Δ1leu2Δ0met15Δ0ura3Δ0</i>                                                                                                                                                                                        | OpenBiosystems            |

|             |                                                             |                          |     |
|-------------|-------------------------------------------------------------|--------------------------|-----|
| AAKB2_HUMAN | ARPTVIRWSEGKGEVFISGSFNNWSTKIPLIK---SHNDFVAI                 | LDLPEGEHQYKFFVDGQ        | 132 |
| AAKB1_RAT   | ARPTVFRWTGGGKEVYLSGSFNNWS-KIPLTR---SQNNFVAI                 | LDLPEGEHQYKFFVDGQ        | 132 |
| SIP2_YEAST  | MVPVEIRWQQGGSKVYVTGSFTKWRKMIGLIPDSNNGSFHVKLRLLPGTHRFRFIVDNE |                          | 222 |
| GAL83_YEAST | MFPVDITWQQGKNKYVTGSFTGWRKMIGLVPVPGQPLMHVKLQLPPGTHRFRFIVDNE  |                          | 220 |
|             | *. : * **.::::***. * : * . . : . * * * *:::***.:            |                          |     |
| AAKB2_HUMAN | WVHDPSEPVTSQLGTINNLIHVKKSDFE                                | VFDAL-----KLDSMESSE----- | 175 |
| AAKB1_RAT   | WTHDPSEPIVTSQLGTVNNIIQVKKTDFE                               | VFDAL-----MVDSQKCS-----  | 175 |
| SIP2_YEAST  | LRVSDFLPTATDQMGNFVNYIEVRQPEKNPTNEK--IR-----                 | SKEADSMRPPTSDRSS         | 274 |
| GAL83_YEAST | LRFSDYLPATDQMGNFVNYMEVSAPPDWGNEPQQHLAEKKANHVDSDSKLSKRPMARS  |                          | 280 |
|             | . * * * * * : :                                             |                          |     |

|             |                                                                |     |
|-------------|----------------------------------------------------------------|-----|
| SNF1_YEAST  | MSSNNNTNTAPANANSSHHHHHHHHHHHHHGGGNSSTLNNPKSSLADGAHIGNYQIVKT    | 60  |
| AAPK1_HUMAN | -----MRLSSWRKMATAEKQKHDGRVKIGHYILGDT                           | 32  |
| AAPK1_RAT   | -----MRLSSWRKMATAEKQKHDGRVKIGHYILGDT                           | 32  |
|             | : . . . . * . . . . :***: : *                                  |     |
|             |                                                                |     |
| SNF1_YEAST  | LGEFSFGVKVLAYHTTTGQKVALKIINKVLAKSDMQGRIEREISYLRLLRHPHIICKLYD   | 120 |
| AAPK1_HUMAN | LGVGTFCKVKVGKHELTGHKVAVKILNRQKIRSLDVVGKIRREIQNLKLFRRHPHIICKLYQ | 92  |
| AAPK1_RAT   | LGVGTFCKVKVGKHELTGHKVAVKILNRQKIRSLDVVGKIRREIQNLKLFRRHPHIICKLYQ | 92  |
|             | ** *:*****: . * **:***:***:***: : . * *:***.***.***:*****:     |     |
|             |                                                                |     |
| SNF1_YEAST  | VIKSKDEIIMVIEYA-GNELFDYIVQRDKMSEQEARRFFQQIISAVEYCHRHKIVHRDLK   | 179 |
| AAPK1_HUMAN | VISTPSDIFMVMEYVSGGELFDYICKNGRLDEKESRRLFQQILSGVDYCHRMVVRDLK     | 152 |
| AAPK1_RAT   | VISTPSDIFMVMEYVSGGELFDYICKNGRLDEKESRRLFQQILSGVDYCHRMVVRDLK     | 152 |
|             | ** . . . . . * * * * * . . . . . * * * * * . . . . . * * * * * |     |

The whole sequences from AAKB2\_HUMAN, AAKB1\_RAT, SIP2\_YEAST, GAL83\_YEAST, and SNF1\_YEAST, AAPK1\_HUMAN and AAPK1\_RAT entries from UniprotKB database were submitted to Clustal Omega (<https://www.ebi.ac.uk/Tools/msa/clustalo/>) in order to obtain a reliable multiple sequence alignment. Only the partial alignment containing residues involved at the interface between the CBM/GBD of the  $\beta$ -subunit and the AMPK kinase domain were shown in the Supplementary Figure S1. These residues were identified by an analysis on rat AMPK complex structure (PDB ID: 4qfg) since it is the only structure available with no activators positioned at the interface. The analysis of the contact residues was performed by UCSF Chimera software, by imposing a threshold of 4 Å from the interacting partner.
